# Supplementary material
Source: HighWire-hosted journal article supplement (http://cmaj.ca/highwire/filestream/149201/field_highwire_adjunct_files/0/230249-res-1-at.pdf)
Supplement: 230249-res-1-at.pdf [file 230249-res-1-at.pdf]

**Table 1S: Data sources and general descriptors by pandemic phase**

| Pandemic Phase                                    | Study Descriptors | Canadian Blood Services (CBS) | Héma-Québec (HQ) | Alberta Precision Laboratories (ABPL) | Manitoba Seroprevalence (MBSC) | Saskatchewan Seroprevalence (SKPH) | Canadian Partnership for Tomorrow's Health (CanPath) | Action to beat Coronavirus (Ab-C) |
|---------------------------------------------------|-------------------|-------------------------------|------------------|---------------------------------------|--------------------------------|------------------------------------|------------------------------------------------------|-----------------------------------|
| Pre-Vaccine Phase (2020-03-01 to 2021-01-01)      | Reporting Scale   | Monthly                       | One Period       | One period                            | Quarterly                      | Monthly                            | NA                                                   | Two periods                       |
|                                                   | % Female          | 44                            | 45               | 45                                    | 50                             | 57.6                               | NA                                                   | 58                                |
|                                                   | Age range         | 17- 60+                       | 18-70+           | 0-80+                                 | 1-60+                          | 0-80+                              | NA                                                   | 18+                               |
| Vaccine roll-out Phase (2021-01-01 to 2021-12-14) | Reporting Scale   | Monthly                       | Monthly          | One period                            | Monthly                        | Monthly                            | Monthly                                              | Two periods                       |
|                                                   | % Female          | 40                            | 45               | NA                                    | 50                             | 66                                 | 67                                                   | 59                                |
|                                                   | Age range         | 17- 60+                       | 18-70+           | 0-80+                                 | 1-60+                          | 0-80+                              | 22-93                                                | 18+                               |
| Omicron Waves (2021-12-15 to 2022-09-30)          | Reporting Scale   | Weekly                        | Monthly          | Bi-Monthly                            | Monthly                        | Monthly                            | Monthly                                              | One estimate                      |
|                                                   | % Female          | 43                            | 32               | 55                                    | 50                             | 67                                 | 67                                                   | 59                                |
|                                                   | Age range         | 17- 60+                       | 18-60+           | 0-80+                                 | 1-60+                          | 0-80+                              | 22-93                                                | 18+                               |

**Table 2S: Data sources and Anti-Nucleocapsid estimate (infection-acquired seroprevalence) descriptors by pandemic phase**

| Pandemic Phase                                           | Study Descriptors                     | Canadian Blood Services (CBS) | Héma-Québec (HQ)        | Alberta Precision Laboratories (ABPL)          | Manitoba Seroprevalence (MBSC) | Saskatchewan Seroprevalence (SKPH) | Canadian Partnership for Tomorrow's Health (CanPath) | Action to beat Coronavirus (Ab-C) |
|----------------------------------------------------------|---------------------------------------|-------------------------------|-------------------------|------------------------------------------------|--------------------------------|------------------------------------|------------------------------------------------------|-----------------------------------|
| <b>Pre-Vaccine Phase (2020-03-01 to 2021-01-01)</b>      | <b>Assay used</b>                     | Abbott (1)                    | NA                      | Abbott Architect, confirmed by DiaSorin (2, 3) | Abbott                         | Abbott                             | NA                                                   | NA                                |
|                                                          | <b>Assay Sensitivity/ Specificity</b> | 92.7% / 99.9%                 | NA                      | 71-100% / ≥98% *                               | 99.4% / 99.6%                  | 69.7% / 97.6%                      | NA                                                   | NA                                |
|                                                          | <b>No. of estimates contributed*</b>  | 80                            | NA                      | 33                                             | 5                              | 8                                  | NA                                                   | NA                                |
|                                                          | <b>Total No. of blood samples</b>     | 130511                        | NA                      | 82944                                          | 5418                           | 10202                              | NA                                                   | NA                                |
| <b>Vaccine roll-out Phase (2021-01-01 to 2021-12-14)</b> | <b>Assay used</b>                     | Roche (Anti-N) (4)            | ELISA-HQ (5)            | Abbott Architect, confirmed by DiaSorin (2, 6) | Abbott                         | Abbott                             | ELISA-based                                          | ELISA-based (7)                   |
|                                                          | <b>Assay Sensitivity/ Specificity</b> | 99.5% / 99.8%                 | 98.9% / 98.5%           | 71-100% / ≥98% *                               | 99.4% / 99.6%                  | 69.7% / 97.6%                      | 92.3 / 99.4                                          | 92% / 99%                         |
|                                                          | <b>No. of estimates contributed</b>   | 130                           | 11                      | 1                                              | 7                              | 19                                 | 45                                                   | 6                                 |
|                                                          | <b>Total No. of blood samples</b>     | 146680                        | 2554                    | 11049                                          | 6548                           | 2607                               | 24,702                                               | 12004                             |
| <b>Omicron Waves (2021-12-15 to 2022-09-30)</b>          | <b>Assay used</b>                     | Roche                         | ELISA-HQ (Anti-N) (5)** | Abbott Architect, confirmed by DiaSorin (2)    | Abbott                         | Abbott                             | ELISA-based                                          | ELISA-based (8, 9)                |
|                                                          | <b>Assay Sensitivity/ Specificity</b> | 99.5% / 99.8%                 | NA                      | 71-100% / ≥98% *                               | 99.4% / 99.6%                  | 69.7% / 97.6%                      | 87.6 / 90.4                                          | 92% / 99%                         |

|  |                                     |         |      |        |      |      |        |      |
|--|-------------------------------------|---------|------|--------|------|------|--------|------|
|  | <b>No. of estimates contributed</b> | 458     | 21   | 32     | 31   | 39   | 44     | 1    |
|  | <b>Total No. of blood samples</b>   | 327,484 | 2509 | 33,800 | 5632 | 9077 | 17,123 | 5031 |

\*71% Sensitivity refers to samples 0-14 days from positive PCR. 100% Sensitivity refers to those >21 days from positive PCR. Reported sensitivity and specificity refers to the Abbott Architect assay only. Sensitivity and specificity for Abbott Architect confirmed by Diasorin is unknown.

**Table 3S: Data sources and Anti-Spike estimate (vaccine-induced seroprevalence) descriptors by pandemic phase**

| <b>Pandemic Phase</b>                                    | <b>Study Descriptors</b>             | <b>Canadian Blood Services (CBS)</b> | <b>Héma-Québec (HQ)</b>  | <b>Alberta Precision Laboratories (ABPL)</b> | <b>Manitoba Seroprevalence (MBSC)</b> | <b>Saskatchewan Seroprevalence (SKPH)</b> | <b>Canadian Partnership for Tomorrow's Health (CanPath)</b> | <b>Action to beat Coronavirus (Ab-C)</b> |
|----------------------------------------------------------|--------------------------------------|--------------------------------------|--------------------------|----------------------------------------------|---------------------------------------|-------------------------------------------|-------------------------------------------------------------|------------------------------------------|
| <b>Pre-Vaccine Phase (2020-03-01 to 2021-01-01)</b>      | <b>Assay used</b>                    | NA                                   | ELISA-HQ (Anti-RBD) (10) | NA                                           | NA                                    | DiaSorin                                  | NA                                                          | ELISA-based (11)                         |
|                                                          | <b>Sensitivity/ Specificity</b>      | NA                                   | 98.9% / 98.5% (12)       | NA                                           | NA                                    | 95.3% / 100%                              | NA                                                          | 98.5% / 98.8%                            |
|                                                          | <b>No. of estimates contributed*</b> | NA                                   | 1                        | NA                                           | NA                                    | 8                                         | NA                                                          | 10                                       |
|                                                          | <b>Total No. of blood samples</b>    | NA                                   | 7691                     | NA                                           | NA                                    | 10202                                     | NA                                                          | 19898                                    |
| <b>Vaccine roll-out Phase (2021-01-01 to 2021-12-14)</b> | <b>Assay used</b>                    | Roche                                | ELISA-HQ (Anti-RBD) (10) | Abbott (Anti-RBD) (13)                       | NA                                    | DiaSorin                                  | NA                                                          | NA                                       |
|                                                          | <b>Sensitivity/ Specificity</b>      | 99.5% / 99.8%                        | 98.9% / 98.5% (12)       | 71-100% / 98%                                | NA                                    | 95.3% / 100%                              | 98.5% / 98.8%                                               | NA                                       |

|                                                 |                                     |               |                          |                        |               |              |               |    |
|-------------------------------------------------|-------------------------------------|---------------|--------------------------|------------------------|---------------|--------------|---------------|----|
|                                                 | <b>No. of estimates contributed</b> | 90            | 1                        | 6                      | NA            | 3            | 45            | NA |
|                                                 | <b>Total No. of blood samples</b>   | 182320        | 2554                     | 67888                  | NA            | 2608         | 24,702        | NA |
| <b>Omicron Waves (2021-12-15 to 2022-09-30)</b> | <b>Assay used</b>                   | Roche         | ELISA-HQ (Anti-RBD) (10) | Abbott (Anti-RBD) (13) | Diasorin      | DiaSorin     | ELISA-based   | NA |
|                                                 | <b>Sensitivity/ Specificity</b>     | 99.5% / 99.8% | 98.9% / 98.5% (12)       | 71-100% / 98%          | 95.7% / 98.9% | 95.3% / 100% | 99.8% / 98.9% | NA |
|                                                 | <b>No. of estimates contributed</b> | 77            | 1                        | 4                      | 6             | 7            | 44            | NA |
|                                                 | <b>Total No. of blood samples</b>   | 252634        | 567                      | 34074                  | 5632          | 9077         | 17,123        | NA |

## Supplemental Figures

**Figure S1. SARS-CoV-2 infection-acquired and vaccine-induced seroprevalence in Canada (March 2020 to end of February 2023): anti-nucleocapsid and anti-spike seropositivity for all age groups, combined, by region on the logit y-scale.**

Each point represents a seroprevalence estimate from a project at the mid-point of a sample collection period, all age groups, combined. Infection-acquired seropositivity was measured as anti-nucleocapsid or anti-spike seropositivity prior to Jan 2021 but only anti-nucleocapsid seropositivity after Dec 2020. The solid and dashed black lines respectively represent the population-weighted mean of the anti-N and anti-S seroprevalence Bayesian model estimates. The grey bands represent the 95% credible intervals. For the purposes of plotting, contributed seroprevalence estimates equal to 0 or 1 were replaced with 0.001 and 0.999, respectively. For modelling, however, the number of participants seropositive and denominators were used, and zeros were not altered.

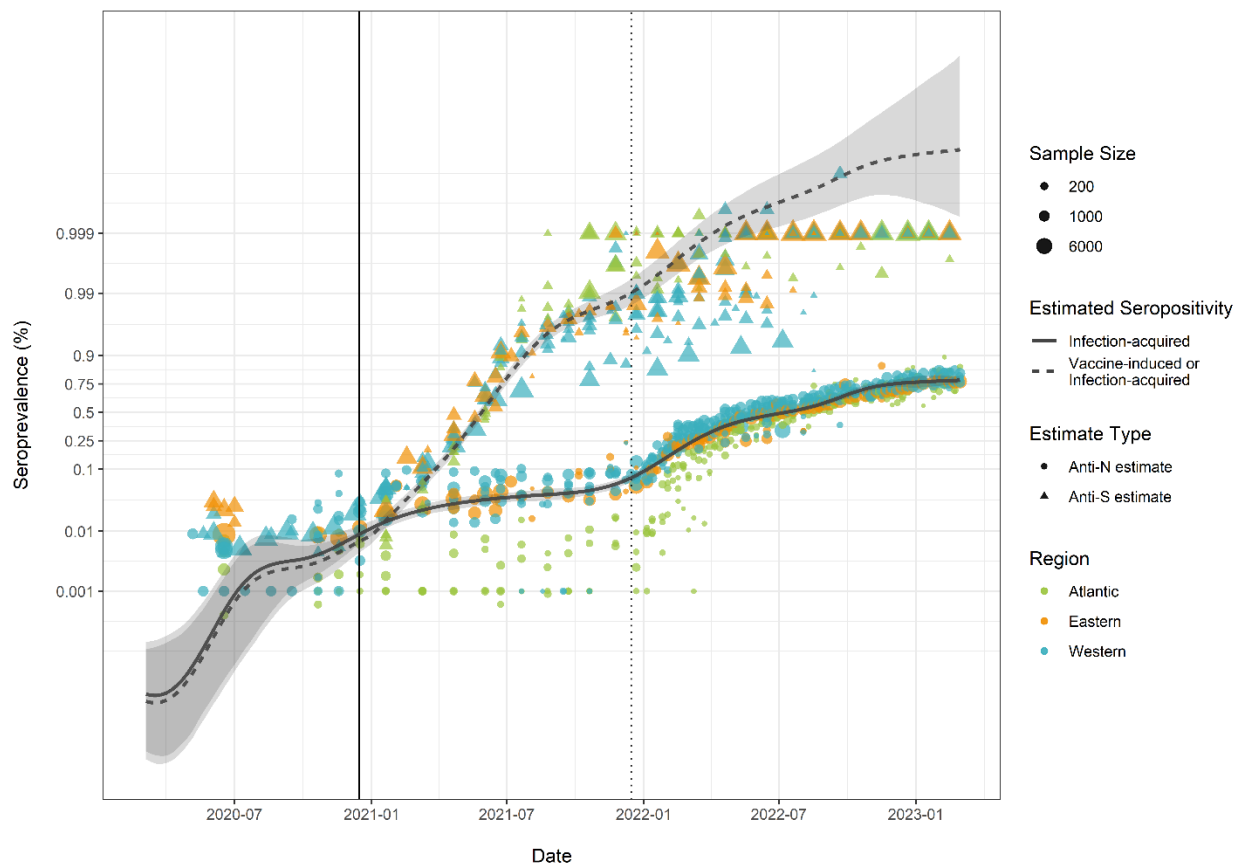

**Figure S2. Age differences in infection-acquired seroprevalence: anti-nucleocapsid seropositivity estimates by median age (March 2020 to March 2023)**

Each point represents a seroprevalence estimate from a project that stratified estimates for age groups, generally separating children and adults and spanning 30 years or less. Each estimate is plotted at the mid-point of the sample collection period and coloured for the corresponding age group. The colored trend lines represent the average anti-N seroprevalence estimated from a Bayesian hierarchical model that accounts for sample size. See the methods section for details of the statistical model.

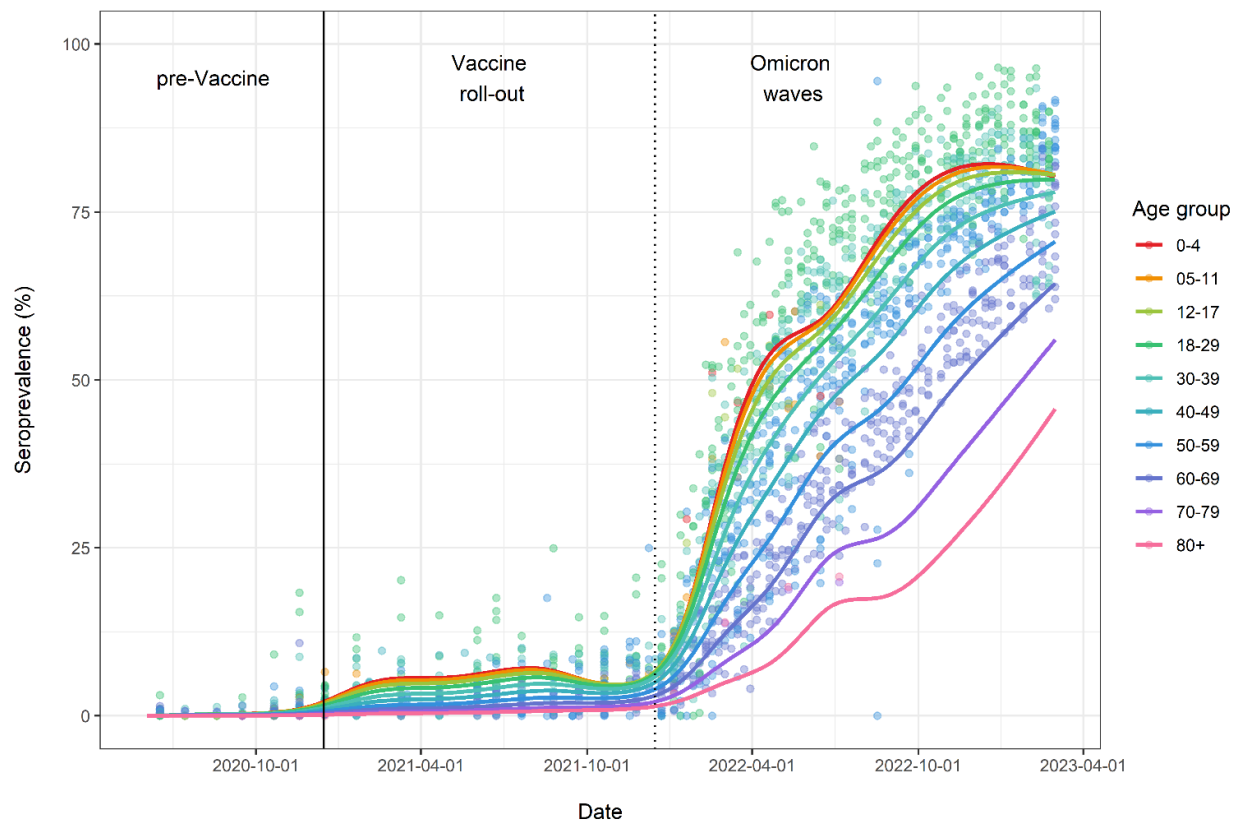

**Figure S3. Age differences in infection-acquired seroprevalence: anti-nucleocapsid seropositivity estimates by age group and province (March 2020 to March 2023)**

Each point represents a seroprevalence estimate from a project that sampled from a particular province and stratified estimates for age groups, generally separating children and adults and spanning 30 years or less. Each estimate is plotted at the mid-point of the sample collection period and coloured for the corresponding age group. The colored trend lines represent the average anti-N seroprevalence estimated from a Bayesian hierarchical model that accounts for sample size. The colored bands represent the 95% credible intervals. See the methods section for details of the statistical model.

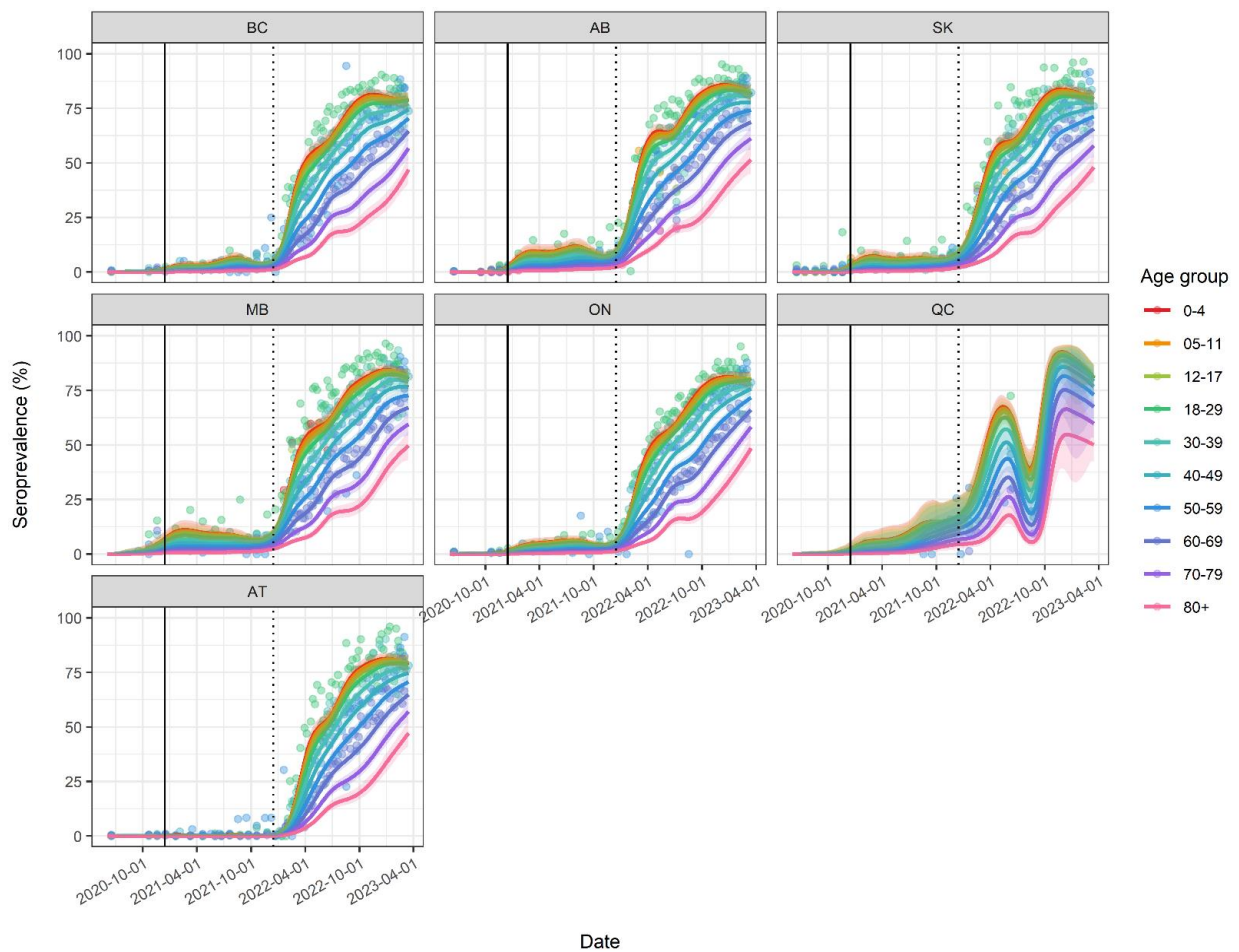

## References

1. Saeed S, Drews SJ, Pambrun C, Yi QL, Osmond L, O'Brien SF. SARS-CoV-2 seroprevalence among blood donors after the first COVID-19 wave in Canada. *Transfusion*. 2021;61(3):862-72.
2. Charlton CL, Nguyen LT, Bailey A, Fenton J, Plitt SS, Marohn C, et al. Pre-Vaccine Positivity of SARS-CoV-2 Antibodies in Alberta, Canada during the First Two Waves of the COVID-19 Pandemic. *Microbiol Spectr*. 2021;9(1):e0029121.
3. Charlton CL, Nguyen LT, Bailey A, Fenton J, Plitt SS, Marohn C, et al. Pre-vaccine positivity of SARS-CoV-2 antibodies in Alberta, Canada during the first two waves of the COVID-19 pandemic. *Microbiology Spectrum*. 2021;9(1):e00291-21.
4. O'Brien SF, Caffrey N, Yi Q-L, Bolotin S, Janjua NZ, Binka M, et al. Cross-Canada Variability in Blood Donor SARS-CoV-2 Seroprevalence by Social Determinants of Health. *Microbiology Spectrum*. 2023:e03356-22.
5. Bazin R, Rochette S, Perreault J, Fournier M-J, Grégoire Y, Boivin A, et al. Development and use of a method based on the anti-N reactivity of longitudinal samples to better estimate SARS-CoV-2 seroprevalence in a vaccinated population. *medRxiv*. 2022:2022.08.15.22278798.
6. Kanji JN, Nguyen LT, Plitt SS, Charlton CL, Fenton J, Braun S, et al. Seropositivity to SARS-CoV-2 in Alberta, Canada in a post-vaccination period (March 2021–July 2021). *Infectious Diseases*. 2022;54(9):666-76.
7. Tang X, Sharma A, Pasic M, Brown P, Colwill K, Gelband H, et al. Assessment of SARS-CoV-2 seropositivity during the first and second viral waves in 2020 and 2021 among Canadian adults. *JAMA Network Open*. 2022;5(2):e2146798-e.
8. Brown PE, Fu SH, Bansal A, Newcombe L, Colwill K, Mailhot G, et al. Omicron BA. 1/1.1 SARS-CoV-2 infection among vaccinated Canadian adults. *New England Journal of Medicine*. 2022;386(24):2337-9.
9. Colwill K, Galipeau Y, Stuiblé M, Gervais C, Arnold C, Rathod B, et al. A scalable serology solution for profiling humoral immune responses to SARS-CoV-2 infection and vaccination. *Clin Transl Immunology*. 2022;11(3):e1380.
10. Lewin A, Therrien R, De Serres G, Grégoire Y, Perreault J, Drouin M, et al. SARS-CoV-2 seroprevalence among blood donors in Québec, and analysis of symptoms associated with seropositivity: a nested case-control study. *Canadian Journal of Public Health*. 2021;112(4):576-86.
11. Investigators AtbcApblcS, Jha P. COVID Seroprevalence, Symptoms and Mortality During the First Wave of SARS-CoV-2 in Canada. *MedRxiv*. 2021:2021.03.04.21252540.
12. Lewin A, Therrien R, De Serres G, Grégoire Y, Perreault J, Drouin M, et al. SARS-CoV-2 seroprevalence among blood donors in Québec, and analysis of symptoms associated with seropositivity: a nested case-control study. *Can J Public Health*. 2021;112(4):576-86.
13. Kanji JN, Nguyen LT, Plitt SS, Charlton CL, Fenton J, Braun S, et al. Seropositivity to SARS-CoV-2 in Alberta, Canada in a post-vaccination period (March 2021–July 2021). *Infectious Diseases*. 2022;54(9):666-76.
